# Supplementary material
Source: HighWire-hosted journal article supplement (https://www.annfammed.org/highwire/filestream/13344/field_highwire_adjunct_files/0/Gulliford_Supp_Figs_1-3_Supp_Table_1.pdf)
Supplement: Gulliford_Supp_Figs_1-3_Supp_Table_1.pdf [file Gulliford_Supp_Figs_1-3_Supp_Table_1.pdf]

**Supplemental materials for:**

Winter JR, Charlton J, Ashworth M, Bunce C, Gulliford MC. Peritonsillar abscess and antibiotic prescribing for respiratory infection in primary care: a population-based cohort study and decision-analytic model. *Ann Fam Med.* 2020;18(5):390-396.

**Supplemental Figure 1: The incidence of first cases of peritonsillar abscess reported from 2002-2017, stratified by gender.**

Age-standardised PTA incidence (top) by year from 2002-2017, and age-specific PTA incidence for five-year age groups (bottom) for the period 2002-2017.

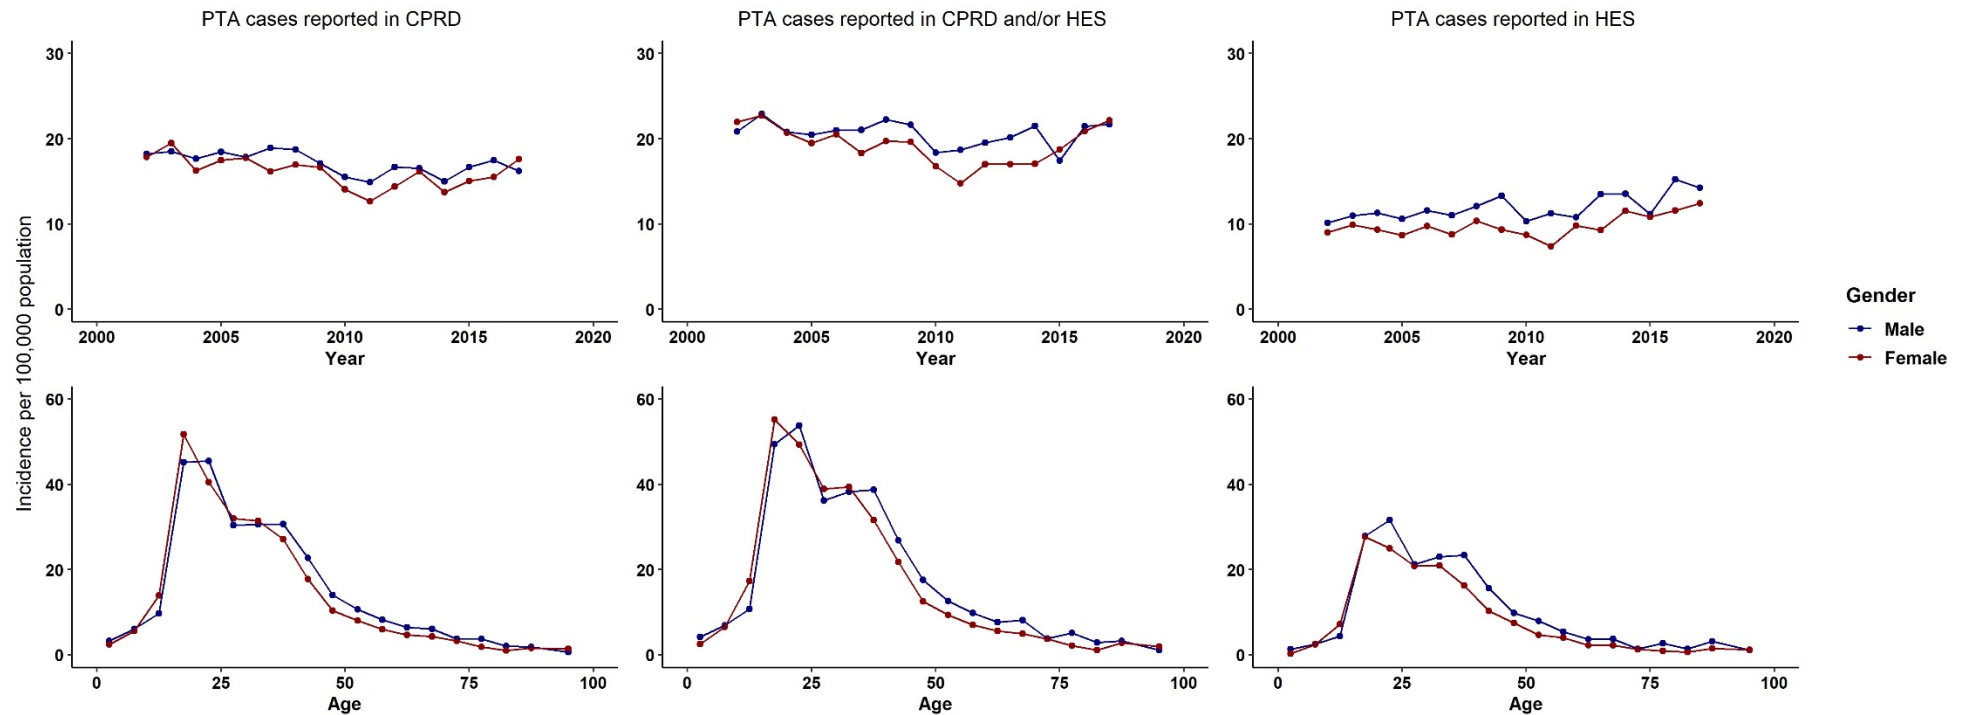

Supplemental Figure 2: Consultation rate for self-limiting respiratory tract infections (RTI) per 1,000 patient years and proportion (%) of RTI consultations with antibiotics (AB) prescribed 2002 to 2017.

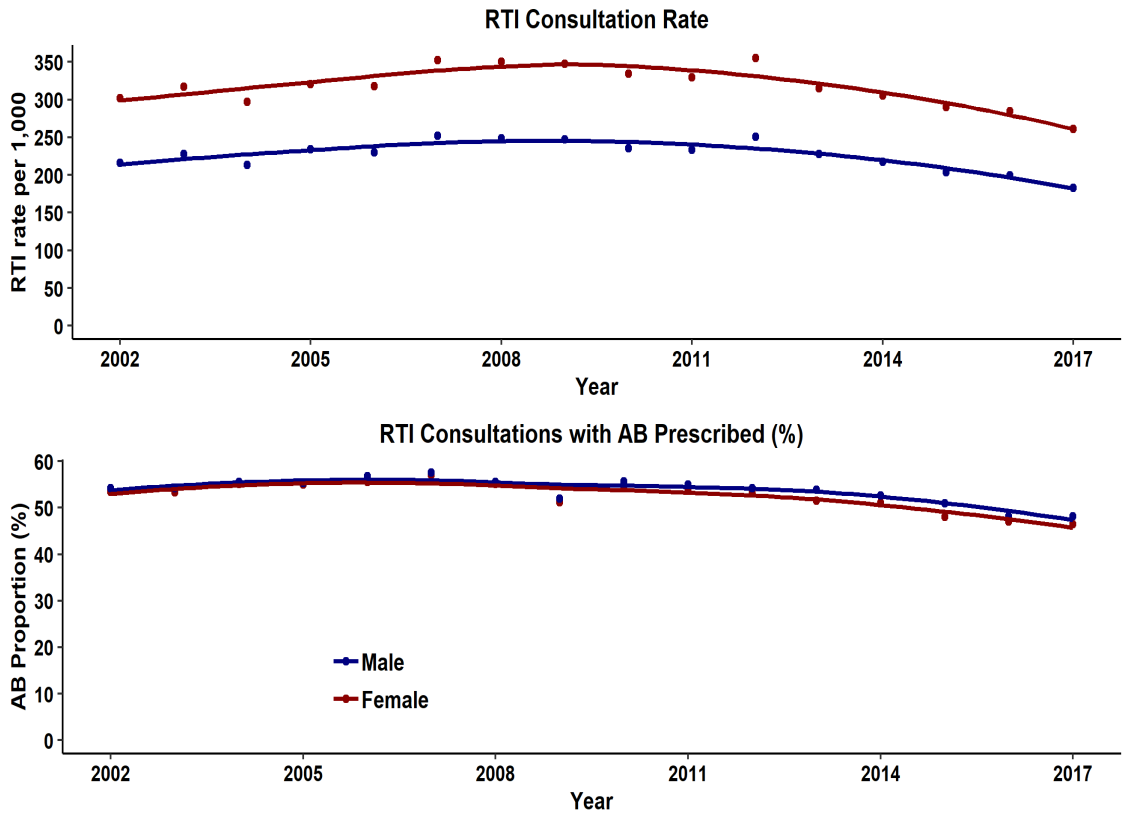

**Supplemental Figure 3: Age- and gender-specific monthly probability of PTA in patients who consulted for RTI, with and without antibiotic prescription**

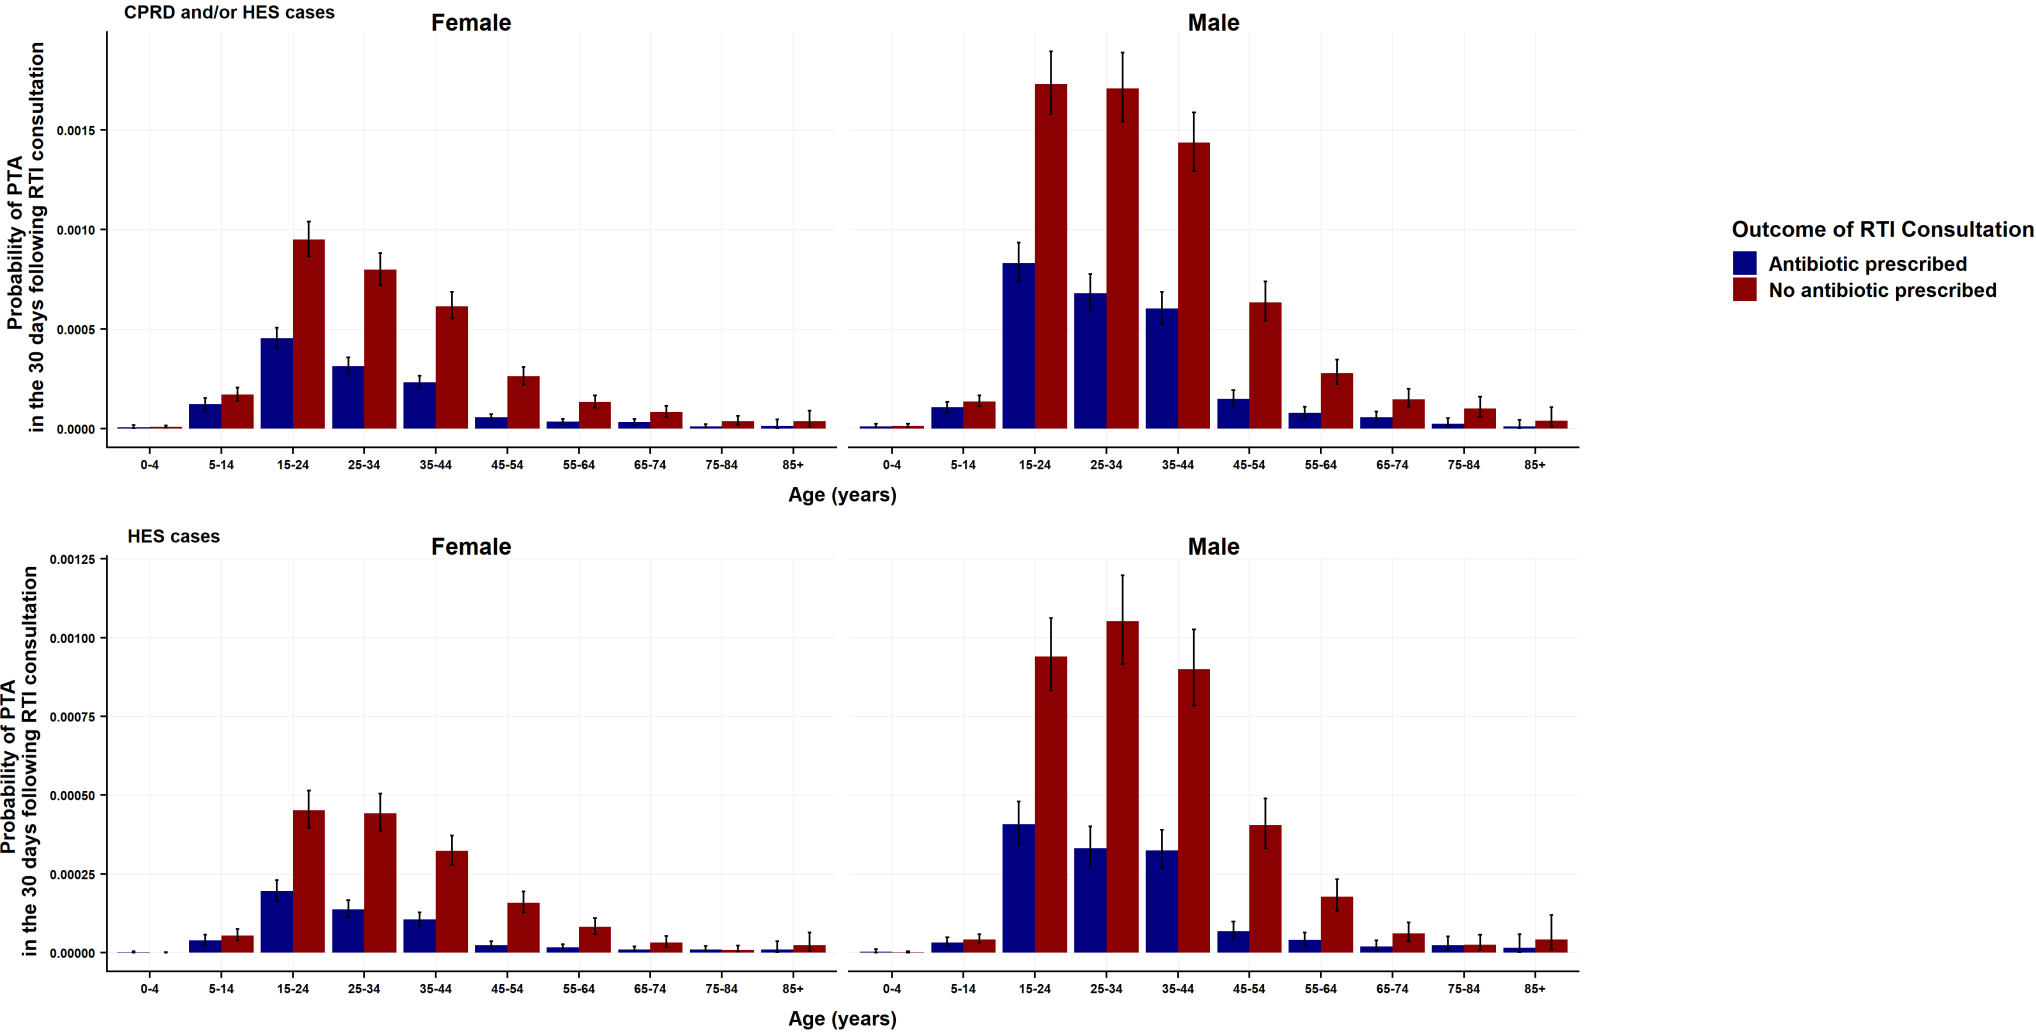

Top: PTA cases reported in CPRD or HES. Bottom: PTA cases reported in HES

**Supplemental Table 1: Probability of peritonsillar abscess in 30 days following a consultation for RTI, and estimated number of antibiotic prescriptions required to prevent one case of peritonsillar abscess by age group and gender. Bracketed figures are 95% uncertainty intervals.**

| Age group (years) | MALE                          |                        | FEMALE                        |                        |
|-------------------|-------------------------------|------------------------|-------------------------------|------------------------|
|                   | Probability of PTA (x100,000) |                        | Probability of PTA (x100,000) |                        |
|                   | Without antibiotic            | With antibiotic        | Without antibiotic            | With antibiotic        |
| 0 to 4            | 1.1<br>(0.6 to 1.7)           | 0.9<br>(0.4 to 1.7)    | 0.9<br>(0.4 to 1.4)           | 0.8<br>(0.3 to 1.5)    |
| 5 to 14           | 14.3<br>(12.2 to 16.6)        | 10.3<br>(8.5 to 12.3)  | 16.4<br>(14.1 to 18.8)        | 10.8<br>(8.9 to 12.9)  |
| 15 to 24          | 177.1<br>(165.3 to 189.6)     | 87.8<br>(80.5 to 95.7) | 97.4<br>(90.9 to 104.4)       | 48.1<br>(44.0 to 52.5) |
| 25 to 34          | 171.7<br>(158.3 to 185.8)     | 63.6<br>(57.1 to 70.6) | 79.5<br>(73.4 to 85.7)        | 29.0<br>(26.0 to 32.2) |
| 35 to 44          | 141.2<br>(130.2 to 152.7)     | 53.3<br>(47.7 to 59.0) | 62.3<br>(57.3 to 67.7)        | 21.2<br>(18.9 to 23.6) |
| 45 to 54          | 65.0<br>(57.8 to 72.9)        | 17.4<br>(14.3 to 20.9) | 27.6<br>(24.3 to 31.2)        | 6.8<br>(5.5 to 8.2)    |
| 55 to 64          | 25.8<br>(21.4 to 30.6)        | 10.1<br>(7.8 to 12.6)  | 12.4<br>(10.2 to 14.9)        | 4.4<br>(3.4 to 5.6)    |
| 65 to 74          | 12.7<br>(9.7 to 16.1)         | 4.3<br>(2.9 to 6.1)    | 7.7<br>(5.8 to 9.8)           | 2.6<br>(1.7 to 3.6)    |
| 75 to 84          | 8.3<br>(5.3 to 12.0)          | 3.1<br>(1.6 to 5.1)    | 3.7<br>(2.2 to 5.6)           | 1.5<br>(0.7 to 2.5)    |
| 85+               | 4.1<br>(1.4 to 8.9)           | 0.8<br>(0.1 to 2.6)    | 4.1<br>(1.6 to 7.9)           | 1.0<br>(0.1 to 2.8)    |
